# Supplementary material
Source: PubMed Central journal article supplement (PMC7820685)
Supplement: JCB893600_Supplemental_Material.pdf [file JCB893600_Supplemental_Material.pdf]

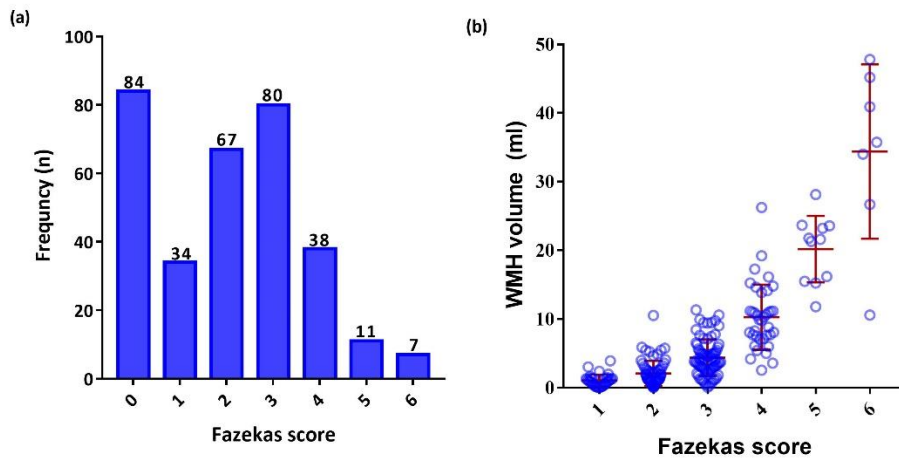

**Figure 1 (a).** The frequency bar graph showing the number of subjects categorized by Fazekas scores; **(b).** The scatterplot showing the association of Fazekas scores and white matter hyperintensities volume (ml),  $r = 0.75$ ,  $p < 0.001$ ,

**Table 1 Group comparisons of Atlas-based tracts**

| White Matter Tracts                        | FAZEKAS |      |                    |                     |                     |                     | Mean  | SD   |
|--------------------------------------------|---------|------|--------------------|---------------------|---------------------|---------------------|-------|------|
|                                            | 1vs0    | 2vs0 | 3vs0               | 4vs0                | 5vs0                | 6vs0                |       |      |
| Anterior corona radiata R                  | -       | -    | 0.001 <sup>a</sup> | <0.001 <sup>a</sup> | <0.001 <sup>a</sup> | <0.001 <sup>a</sup> | 0.376 | .002 |
| Anterior corona radiata L                  | -       | -    | 0.001 <sup>a</sup> | <0.001 <sup>a</sup> | <0.001 <sup>a</sup> | <0.001 <sup>a</sup> | 0.373 | .001 |
| Posterior thalamic radiation R             | -       | -    | 0.007              | <0.001 <sup>a</sup> | <0.001 <sup>a</sup> | <0.001 <sup>a</sup> | 0.507 | .002 |
| Superior fronto-occipital fasciculus L     | -       | -    | 0.001 <sup>a</sup> | <0.001 <sup>a</sup> | <0.001 <sup>a</sup> | <0.001 <sup>a</sup> | 0.370 | .003 |
| Middle cerebellar peduncle                 | -       | -    | -                  | <0.001 <sup>a</sup> | 0.001 <sup>a</sup>  | <0.001 <sup>a</sup> | 0.396 | .000 |
| Genu of corpus callosum                    | -       | -    | -                  | <0.001 <sup>a</sup> | 0.001 <sup>a</sup>  | <0.001 <sup>a</sup> | 0.512 | .001 |
| Body of corpus callosum                    | -       | -    | -                  | <0.001 <sup>a</sup> | 0.01 <sup>a</sup>   | <0.001 <sup>a</sup> | 0.557 | .001 |
| Splenium of corpus callosum                | -       | -    | -                  | <0.001 <sup>a</sup> | <0.001 <sup>a</sup> | <0.001 <sup>a</sup> | 0.672 | .001 |
| Anterior limb of internal capsule R        | -       | -    | -                  | <0.001 <sup>a</sup> | <0.001 <sup>a</sup> | <0.001 <sup>a</sup> | 0.478 | .001 |
| Anterior limb of internal capsule L        | -       | -    | -                  | <0.001 <sup>a</sup> | <0.001 <sup>a</sup> | <0.001 <sup>a</sup> | 0.477 | .001 |
| Retrolenticular part of internal capsule R | -       | -    | -                  | <0.001 <sup>a</sup> | 0.008 <sup>a</sup>  | <0.001 <sup>a</sup> | 0.507 | .001 |
| Retrolenticular part of internal capsule L | -       | -    | -                  | <0.001 <sup>a</sup> | 0.002 <sup>a</sup>  | <0.001 <sup>a</sup> | 0.524 | .001 |
| Superior corona radiata R                  | -       | -    | -                  | 0.004 <sup>a</sup>  | 0.005 <sup>a</sup>  | <0.001 <sup>a</sup> | 0.425 | .001 |
| Superior corona radiata L                  | -       | -    | -                  | 0.007 <sup>a</sup>  | 0.001 <sup>a</sup>  | <0.001 <sup>a</sup> | 0.429 | .001 |
| Posterior corona radiata R                 | -       | -    | -                  | <0.001 <sup>a</sup> | <0.001 <sup>a</sup> | <0.001 <sup>a</sup> | 0.422 | .001 |
| Posterior corona radiata L                 | -       | -    | -                  | <0.001 <sup>a</sup> | <0.001 <sup>a</sup> | <0.001 <sup>a</sup> | 0.408 | .001 |
| Posterior thalamic radiation L             | -       | -    | -                  | <0.001 <sup>a</sup> | <0.001 <sup>a</sup> | <0.001 <sup>a</sup> | 0.498 | .002 |
| Sagittal stratum R                         | -       | -    | -                  | <0.001 <sup>a</sup> | 0.002 <sup>a</sup>  | <0.001 <sup>a</sup> | 0.458 | .001 |
| Sagittal stratum L                         | -       | -    | -                  | <0.001 <sup>a</sup> | 0.035               | <0.001 <sup>a</sup> | 0.432 | .001 |
| External capsule R                         | -       | -    | -                  | <0.001 <sup>a</sup> | <0.001 <sup>a</sup> | <0.001 <sup>a</sup> | 0.347 | .000 |
| External capsule L                         | -       | -    | -                  | 0.036               | 0.009 <sup>a</sup>  | 0.019 <sup>a</sup>  | 0.359 | .000 |
| Fornix (cres) / Stria terminalis L         | -       | -    | -                  | 0.009 <sup>a</sup>  | 0.011 <sup>a</sup>  | <0.001 <sup>a</sup> | 0.442 | .001 |
| Superior longitudinal fasciculus R         | -       | -    | -                  | <0.001 <sup>a</sup> | <0.001 <sup>a</sup> | <0.001 <sup>a</sup> | 0.417 | .001 |

|                                        |   |   |   |                     |                     |                     |       |      |
|----------------------------------------|---|---|---|---------------------|---------------------|---------------------|-------|------|
| Superior longitudinal fasciculus L     | - | - | - | <0.001 <sup>a</sup> | <0.001 <sup>a</sup> | <0.001 <sup>a</sup> | 0.419 | .001 |
| Superior fronto-occipital fasciculus R | - | - | - | <0.001 <sup>a</sup> | <0.001 <sup>a</sup> | <0.001 <sup>a</sup> | 0.390 | .002 |
| Uncinate fasciculus L                  | - | - | - | 0.006 <sup>a</sup>  | 0.036               | 0.003 <sup>a</sup>  | 0.408 | .001 |
| Tapetum R                              | - | - | - | <0.001 <sup>a</sup> | <0.001 <sup>a</sup> | <0.001 <sup>a</sup> | 0.344 | .002 |
| Tapetum L                              | - | - | - | 0.006 <sup>a</sup>  | <0.001 <sup>a</sup> | <0.001 <sup>a</sup> | 0.260 | .001 |
| Uncinate fasciculus R                  | - | - | - | 0.014 <sup>a</sup>  | -                   | <0.001 <sup>a</sup> | 0.416 | .001 |
| Cerebral peduncle R                    | - | - | - | 0.006 <sup>a</sup>  | -                   | 0.001 <sup>a</sup>  | 0.579 | .001 |
| Cerebral peduncle L                    | - | - | - | 0.001 <sup>a</sup>  | -                   | 0.007 <sup>a</sup>  | 0.581 | .001 |
| Posterior limb of internal capsule R   | - | - | - | 0.045               | -                   | <0.001 <sup>a</sup> | 0.565 | .001 |
| Posterior limb of internal capsule L   | - | - | - | 0.039               | -                   | <0.001 <sup>a</sup> | 0.572 | .001 |
| Superior cerebellar peduncle L         | - | - | - | 0.044               | -                   | <0.001 <sup>a</sup> | 0.496 | .001 |
| Fornix (cres) / Stria terminalis R     | - | - | - | 0.004 <sup>a</sup>  | -                   | <0.001 <sup>a</sup> | 0.405 | .002 |
| Medial lemniscus R                     | - | - | - | -                   | -                   | 0.04 <sup>a</sup>   | 0.531 | .001 |
| Medial lemniscus L                     | - | - | - | -                   | -                   | 0.015 <sup>a</sup>  | 0.531 | .001 |
| Inferior cerebellar peduncle R         | - | - | - | -                   | -                   | 0.014 <sup>a</sup>  | 0.340 | .001 |
| Inferior cerebellar peduncle L         | - | - | - | -                   | -                   | 0.003 <sup>a</sup>  | 0.339 | .000 |
| Superior cerebellar peduncle R         | - | - | - | -                   | -                   | <0.001 <sup>a</sup> | 0.521 | .001 |
| Cingulum (cingulate gyrus) L           | - | - | - | -                   | -                   | <0.001 <sup>a</sup> | 0.458 | .001 |
| Pontine crossing tract (a part of MCP) | - | - | - | -                   | -                   | -                   | 0.398 | .001 |
| Fornix (column and body of fornix)     | - | - | - | -                   | -                   | -                   | 0.285 | .005 |
| Corticospinal tract R                  | - | - | - | -                   | -                   | -                   | 0.407 | .001 |
| Corticospinal tract L                  | - | - | - | -                   | -                   | -                   | 0.415 | .001 |
| Cingulum (cingulate gyrus) R           | - | - | - | -                   | -                   | -                   | 0.425 | .001 |
| Cingulum (hippocampus) R               | - | - | - | -                   | -                   | -                   | 0.345 | .001 |
| Cingulum (hippocampus) L               | - | - | - | -                   | -                   | -                   | 0.342 | .001 |

-:  $p > 0.05$ , all significant differences are presented with p value.

a: represent the results that are still significant after FDR  $q < 0.05$  correction for multiple comparisons.

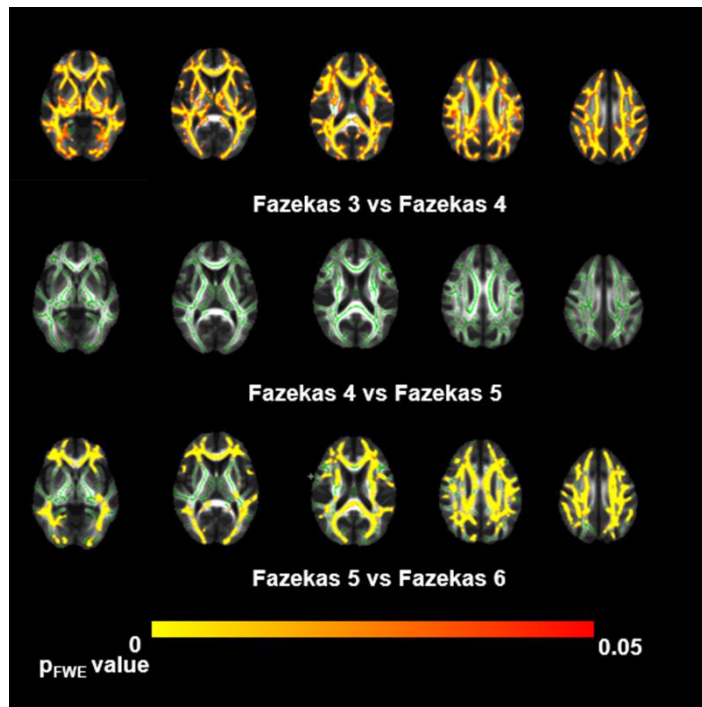

**Figure 2** Tract-based spatial statistics results between white matter hyperintensities groups. A TBSS-derived t-map of decreased fractional anisotropy (FA) in the moderate to severe (Fazekas 3 to 6) the regions showed significant changes were shown in red-yellow ( $p < 0.05$ ; corrected for family-wise error).
